# Supplementary material for: Identification of candidate gene FAM183A and novel pathogenic variants in known genes: High genetic heterogeneity for autosomal recessive intellectual disability
Source: PLoS One. 2018 Nov 30;13(11):e0208324. doi: 10.1371/journal.pone.0208324 (PMC6267965; doi:10.1371/journal.pone.0208324)
Supplement: S1 Table — The gene list is created by using the command ((((mental retardation[Clinical Synopsis]) OR microcephaly[Clinical Synopsis]) OR intellectual disability[Clinical Synopsis]) OR cognitive impairment[Clinical Synopsis]) AND “prefix pound”[Properties] within the web site https://www.ncbi.nlm.nih.gov/omim (accessed 10/02/2018). After curation of the gene list, we analyzed single nucleotide variants, INDELs and copy number variants in the gene list. Due to limitation of the next generation sequencing method that we used, we did not analyze the repeat expansions. (XLSX) [file pone.0208324.s001.xlsx]

## Sheet: Sheet1
GENE	MIM #	GENE	MIM #	GENE	MIM #	GENE	MIM #	GENE	MIM #
AAAS	605378	COX20	614698	GUSB	611499	NR2F1	132890	SLC1A2	600300
AARS	601065	COX6B1	124089	HAAO	604521	NRAS	164790	SLC1A4	600229
AASS	605113	COX7B	300885	HACE1	610876	NRXN1	600565	SLC25A1	190315
ABCC8	600509	COX8A	123870	HADH	601609	NSD1	606681	SLC25A15	603861
ABCC9	601439	CPLANE1	614571	HAL	609457	NSD2	602952	SLC25A19	606521
ABHD5	604780	CPLX1	605032	HCCS	300056	NSDHL	300275	SLC25A22	609302
ACADSB	600301	CPS1	608307	HCFC1	300019	NSMCE2	617246	SLC25A24	608744
ACAT1	607809	CPT2	600650	HCN1	602780	NSUN2	610916	SLC25A4	103220
ACD	609377	CRADD	603454	HDAC6	300272	NT5C2	600417	SLC2A1	138140
ACER3	617036	CRBN	609262	HECW2	617245	NTRK1	191315	SLC2A10	606145
ACO2	100850	CREBBP	600140	HELLS	603946	NTRK2	600456	SLC30A9	604604
ACOX1	609751	CRIPT	604594	HEPACAM	611642	NUP62	605815	SLC35A1	605634
ACOX2	601641	CRLF1	604237	HERC1	605109	NUS1	610463	SLC35A2	314375
ACP5	171640	CSNK2A1	115440	HERC2	605837	OCLN	602876	SLC35A3	605632
ACSL4	300157	CSPP1	611654	HGSNAT	610453	OCRL	300535	SLC35C1	605881
ACTG1	102560	CTBP1	602618	HIST1H1E	142220	OFD1	300170	SLC39A14	608736
ACVR1	102576	CTCF	604167	HIVEP2	143054	OGT	300255	SLC39A8	608732
ADAMTS10	608990	CTDP1	604927	HMGB3	300193	OPA1	605290	SLC45A1	605763
ADAR	146920	CTH	607657	HMGCL	613898	OPHN1	300127	SLC46A1	611672
ADAT3	615302	CTNNB1	116806	HNMT	605238	ORC1	601902	SLC4A4	603345
ADD3	601568	CTSA	613111	HNRNPH2	300610	ORC4	603056	SLC5A5	601843
ADGRG1	604110	CTSD	116840	HNRNPK	600712	ORC6	607213	SLC5A7	608761
ADNP	611386	CUL4B	300304	HNRNPU	602869	OSGEP	610107	SLC6A1	137165
ADRA2B	104260	CWC27	617170	HPD	609695	OTC	300461	SLC6A17	610299
ADSL	608222	CWF19L1	616120	HPRT1	308000	OTUD6B	612021	SLC6A8	300036
AFF2	300806	CYB5R3	613213	HRAS	190020	PACS1	607492	SLC6A9	601019
AFF4	604417	CYP27A1	606530	HSD17B10	300256	PAFAH1B1	601545	SLC9A6	300231
AFG3L2	604581	CYP2U1	610670	HSPD1	118190	PAH	612349	SLX4	613278
AGA	613228	CYP7B1	603711	HSPG2	142461	PAK3	300142	SMAD4	600993
AHDC1	615790	D2HGDH	609186	HTRA1	602194	PARN	604212	SMARCA2	600014
AHI1	608894	DAG1	128239	HTRA2	606441	PAX1	167411	SMARCA4	603254
AHSG	138680	DARS	603084	HTT	613004	PAX2	167409	SMARCB1	601607
AIFM1	300169	DBT	248610	IARS	600709	PAX3	606597	SMARCE1	603111
AIMP1	603605	DCAF17	612515	IBA57	615316	PAX6	607108	SMC1A	300040
AKT1	164730	DCC	120470	IDS	300823	PC	608786	SMC3	606062
AKT3	611223	DCHS1	603057	IDUA	252800	PCDH19	300460	SMG9	613176
ALDH18A1	138250	DCPS	610534	IER3IP1	609382	PCLO	604918	SMOC1	608488
ALDH3A2	609523	DCX	300121	IFIH1	606951	PCNA	176740	SMPD1	607608
ALDH4A1	606811	DDHD2	615003	IFNG	147570	PCNT	605925	SMS	300105
ALDH5A1	610045	DDX11	601150	IFT140	614620	PDE4D	600129	SNAP29	604202
ALDH6A1	603178	DDX3X	300160	IFT172	607386	PDGFB	190040	SNRPB	182282
ALDH7A1	107323	DDX59	615464	IFT27	615870	PDGFRB	173410	SNRPN	182279
ALDOA	103850	DEAF1	602635	IFT74	608040	PDHA1	300502	SOBP	613667
ALDOB	612724	DENND5A	617278	IGBP1	300139	PDHX	608769	SON	182465
ALG1	605907	DEPDC5	614191	IGF1	147440	PDP1	605993	SOS1	182530
ALG13	300776	DGCR2	600594	IGF1R	147370	PDSS1	607429	SOX10	602229
ALG2	607905	DGCR6	601279	IKBKG	300248	PET100	614770	SOX11	600898
ALG3	608750	DGCR8	609030	IL1RAPL1	300206	PEX1	602136	SOX2	184429
ALG9	606941	DGUOK	601465	IMPA1	602064	PEX11B	603867	SOX5	604975
ALX3	606014	DHCR24	606418	INPP5E	613037	PEX12	601758	SP110	604457
ALX4	605420	DHCR7	602858	INPP5K	607875	PEX16	603360	SPAST	604277
AMER1	300647	DHDDS	608172	IPW	601491	PEX2	170993	SPATA5	613940
AMPD2	102771	DHFR	126060	ISCA1	611006	PEX5	600414	SPECC1L	614140
AMT	238310	DHTKD1	614984	ISPD	614631	PEX6	601498	SPG11	610844
ANK3	600465	DIAPH1	602121	ITGA3	605025	PEX7	601757	SPR	182125
ANKLE2	616062	DIP2B	611379	ITGA7	600536	PGAP2	615187	SPTAN1	182810
ANKRD11	611192	DKC1	300126	ITPA	147520	PGAP3	611801	SPTBN2	604985
ANO10	613726	DLAT	608770	ITPR1	147265	PGK1	311800	SQSTM1	601530
ANTXR1	606410	DLD	238331	IYD	612025	PGM3	172100	SRD5A3	611715
AP1S1	603531	DLG3	300189	JAG1	601920	PHC1	602978	SSR4	300090
AP3B1	603401	DMD	300377	JAM3	606871	PHF6	300414	ST3GAL5	604402
AP3B2	602166	DMPK	605377	KANSL1	612452	PHF8	300560	STAC3	615521
AP3D1	607246	DMXL2	612186	KAT6A	601408	PHGDH	606879	STAG1	604358
AP4B1	607245	DNA2	601810	KAT6B	605880	PIEZO2	613629	STAMBP	606247
AP4E1	607244	DNAJC12	606060	KATNB1	602703	PIGA	311770	STIL	181590
AP4M1	602296	DNAJC19	608977	KCNA2	176262	PIGL	605947	STRA6	610745
AP4S1	607243	DNAJC21	617048	KCNC3	176264	PIGN	606097	STRADA	608626
AP5Z1	613653	DNM1	602377	KCND3	605411	PIGO	614730	STS	300747
APC2	612034	DNM1L	603850	KCNH1	603305	PIGP	605938	STT3A	601134
APOPT1	616003	DNMT3A	602769	KCNJ1	600359	PIGT	610272	STT3B	608605
AQP2	107777	DNMT3B	602900	KCNJ10	602208	PIGV	610274	STUB1	607207
ARCN1	600820	DOCK6	614194	KCNJ2	600681	PIGW	610275	STXBP1	602926
ARFGEF2	605371	DOCK8	611432	KCNJ6	600877	PIGY	610662	SUCLA2	603921
ARG1	608313	DOLK	610746	KCNQ2	602235	PIK3CA	171834	SUCLG1	611224
ARHGAP31	610911	DONSON	611428	KCNQ5	607357	PIK3R2	603157	SUFU	607035
ARHGDIA	601925	DPAGT1	191350	KCNT1	608167	PLA2G6	603604	SUMF1	607939
ARHGEF2	607560	DPH1	603527	KCTD7	611725	PLAA	603873	SURF1	185620
ARHGEF6	300267	DPM1	603503	KDM5C	314690	PLEKHG2	611893	SYNGAP1	603384
ARHGEF9	300429	DPM2	603564	KDM6A	300128	PLK4	605031	SYNJ1	604297
ARID1A	603024	DPYD	612779	KIAA1109	611565	PLP1	300401	SYP	313475
ARID1B	614556	DPYS	613326	KIDINS220	615759	PLPBP	604436	TAC3	162330
ARID2	609539	DSTYK	612666	KIF11	148760	PMM2	601785	TACO1	612958
ARL13B	608922	DUOXA2	612772	KIF14	611279	PMPCA	613036	TAF1	313650
ARL6	608845	DVL1	601365	KIF1A	601255	PNKP	605610	TAF13	600774
ARMC9	617612	DVL3	601368	KIF1BP	609367	PNP	164050	TAF2	604912
ARNT2	606036	DYM	607461	KIF2A	602591	PNPLA6	603197	TAF6	602955
ARSE	300180	DYNC1H1	600112	KIF4A	300521	PNPO	603287	TANGO2	616830
ARV1	611647	DYRK1A	600855	KIF5A	602821	POC1A	614783	TAPT1	612758
ARX	300382	EBF3	607407	KIF5C	604593	POGZ	614787	TAT	613018
ASAH1	613468	EBP	300205	KIF7	611254	POLA1	312040	TBC1D20	611663
ASH1L	607999	EDC3	609842	KLHL15	300980	POLG	174763	TBC1D23	617687
ASL	608310	EED	605984	KMT2A	159555	POLH	603968	TBC1D24	613577
ASNS	108370	EEF1A2	602959	KMT2B	606834	POLR1A	616404	TBCD	604649
ASPM	605481	EFEMP2	604633	KMT2C	606833	POLR1C	610060	TBCE	604934
ASS1	603470	EFTUD2	603892	KMT2D	602113	POLR3B	614366	TBL1XR1	608628
ASXL1	612990	EHMT1	607001	KMT5B	610881	POMGNT1	606822	TBX1	602054
ASXL2	612991	EIF2AK3	604032	KNL1	609173	POMK	615247	TCF4	602272
ATAD3A	612316	ELAC2	605367	KPTN	615620	POMT1	607423	TCN2	613441
ATG5	604261	ELN	130160	KRAS	190070	POMT2	607439	TCTN2	613846
ATIC	601731	ELP2	616054	KRT85	602767	POP1	602486	TCTN3	613847
ATL1	606439	EMC1	616846	KYNU	605197	POR	124015	TDP2	605764
ATP1A2	182340	EMG1	611531	L1CAM	308840	PORCN	300651	TECPR2	615000
ATP1A3	182350	EML1	602033	L2HGDH	609584	POU1F1	173110	TECR	610057
ATP2A2	108740	ENTPD1	601752	LAGE3	300060	PPM1D	605100	TELO2	611140
ATP5F1A	164360	EP300	602700	LAMA2	156225	PPP1R15B	613257	TERT	187270
ATP6AP1	300197	EPG5	615068	LAMP2	309060	PPP2R1A	605983	TFAP2A	107580
ATP6AP2	300556	ERCC1	126380	LARGE1	603590	PPP3CA	114105	TG	188450
ATP6V0A2	611716	ERCC2	126340	LARP7	612026	PPT1	600722	TGFBR2	190182
ATP6V1B2	606939	ERCC3	133510	LARS	151350	PQBP1	300463	THOC2	300395
ATP7A	300011	ERCC4	133520	LAS1L	300964	PRDM8	616639	THOC6	615403
ATP8A2	605870	ERCC5	133530	LETM1	604407	PRDX1	176763	TIMM50	607381
ATPAF2	608918	ERCC6	609413	LHX3	600577	PRKAR1A	188830	TINF2	604319
ATR	601215	ERCC6L2	615667	LIAS	607031	PRKD1	605435	TKT	606781
ATRX	300032	ERCC8	609412	LIG4	601837	PRKDC	600899	TMEM107	616183
ATXN1	601556	ERLIN2	611605	LINS1	610350	PRKRA	603424	TMEM165	614726
ATXN10	611150	ESS2	601755	LIPT2	617659	PRMT7	610087	TMEM216	613277
AUH	600529	ETHE1	608451	LMAN2L	609552	PRODH	606810	TMEM237	614423
AUTS2	607270	EVC	604831	LMNA	150330	PRPS1	311850	TMEM240	616101
AVPR2	300538	EVC2	607261	LMNB1	150340	PRSS12	606709	TMEM260	617449
B3GALNT2	610194	EXOSC2	602238	LRP5	603506	PRUNE1	617413	TMEM67	609884
B3GLCT	610308	EXOSC3	606489	LYRM7	615831	PSAT1	610936	TMEM70	612418
B9D1	614144	EXTL3	605744	LZTFL1	606568	PSMB8	177046	TMLHE	300777
BBIP1	613605	EYA1	601653	MAB21L2	604357	PSMD12	604450	TMTC3	617218
BBS1	209901	EZH2	601573	MAD2L2	604094	PSPH	172480	TNIK	610005
BBS10	610148	FAM126A	610531	MAF	177075	PTCH1	601309	TOE1	613931
BBS12	610683	FAM20C	611061	MAG	159460	PTCH2	603673	TP53RK	608679
BBS2	606151	FANCA	607139	MAGEL2	605283	PTCHD1	300828	TP63	603273
BBS4	600374	FANCC	613899	MAN1B1	604346	PTDSS1	612792	TPRKB	608680
BBS5	603650	FANCD2	613984	MAN2B1	609458	PTEN	601728	TRAIP	605958
BBS7	607590	FANCE	613976	MANBA	609489	PTF1A	607194	TRAPPC11	614138
BBS9	607968	FANCI	611360	MAOA	309850	PTPN11	176876	TRAPPC12	614139
BCAP31	300398	FAR1	616107	MAP2K1	176872	PTRH2	608625	TRAPPC9	611966
BCKDHA	608348	FARS2	611592	MAP3K7	602614	PTS	612719	TREX1	606609
BCKDHB	248611	FASTKD2	612322	MAPRE2	605789	PUF60	604819	TRIO	601893
BCL11A	606557	FAT4	612411	MARS2	609728	PUS1	608109	TRIP12	604506
BCL11B	606558	FBLN5	604580	MASP1	600521	PUS3	616283	TRIP13	604507
BCOR	300485	FBN1	134797	MAT1A	610550	PWAR1	600161	TRIT1	617840
BCS1L	603647	FBXL4	605654	MBD5	611472	PWRN1	611215	TRMT10A	616013
BIN1	601248	FBXO31	609102	MBOAT7	606048	PYCR1	179035	TSC1	605284
BLM	604610	FGD1	300546	MBTPS2	300294	PYCR2	616406	TSC2	191092
BPTF	601819	FGF12	601513	MCCC1	609010	QARS	603727	TSEN15	608756
BRAF	164757	FGF14	601515	MCCC2	609014	QDPR	612676	TSEN2	608753
BRAT1	614506	FGFR1	136350	MCM4	602638	RAB18	602207	TSEN54	608755
BRCA1	113705	FGFR2	176943	MCOLN1	605248	RAB39B	300774	TSFM	604723
BRCA2	600185	FGFR3	134934	MCPH1	607117	RAB3GAP1	602536	TSHB	188540
BRF1	604902	FGFRL1	605830	MECP2	300005	RAB3GAP2	609275	TSHR	603372
BRPF1	602410	FH	136850	MED12	300188	RAC1	602048	TSPAN7	300096
BRWD3	300553	FIBP	608296	MED17	603810	RAD21	606462	TTC19	613814
BSCL2	606158	FIG4	609390	MED23	605042	RAD51	179617	TTC8	608132
BSND	606412	FKRP	606596	MED25	610197	RAF1	164760	TTI2	614426
BUB1B	602860	FKTN	607440	MEF2C	600662	RAI1	607642	TUBA1A	602529
C12orf57	615140	FLCN	607273	MEIS2	601740	RANBP2	601181	TUBA8	605742
C2CD3	615944	FLNA	300017	METTL23	615262	RARB	180220	TUBB	191130
CA2	611492	FLNB	603381	MFF	614785	RARS	107820	TUBB2B	612850
CA8	114815	FLVCR1	609144	MFSD2A	614397	RARS2	611524	TUBB3	602661
CACNA1A	601011	FMR1	309550	MGAT2	602616	RBBP8	604124	TUBG1	191135
CACNA1C	114205	FOLR1	136430	MGME1	615076	RBM28	612074	TUBGCP4	609610
CAMK2A	114078	FOXG1	164874	MGP	154870	RBM8A	605313	TUBGCP6	610053
CAMK2B	607707	FOXP1	605515	MICU1	605084	RBMX	300199	TUFM	602389
CAMTA1	611501	FOXRED1	613622	MID2	300204	RBPJ	147183	TUSC3	601385
CANT1	613165	FRAS1	607830	MIPEP	602241	RECQL4	603780	TWIST1	601622
CARS2	612800	FREM1	608944	MIR17HG	609415	RELN	600514	TWIST2	607556
CARS2	612800	FREM2	608945	MKKS	604896	RFT1	611908	TWNK	606075
CASK	300172	FRG1	601278	MKRN3	603856	RFWD3	614151	TXN2	609063
CBS	613381	FRMD4A	616305	MKS1	609883	RIT1	609591	UBA5	610552
CC2D1A	610055	FRMPD4	300838	MLC1	605908	RLIM	300379	UBE2A	312180
CC2D2A	612013	FRRS1L	604574	MLXIPL	605678	RMRP	157660	UBE3A	601623
CCBE1	612753	FTO	610966	MMACHC	609831	RNASEH1	604123	UBE3B	608047
CCDC28B	610162	FTSJ1	300499	MMADHC	611935	RNASEH2A	606034	UBR1	605981
CCDC78	614666	FUCA1	612280	MOCS1	603707	RNASEH2B	610326	UBTF	600673
CCDC88A	609736	G6PC3	611045	MOCS2	603708	RNASEH2C	610330	UFM1	610553
CCDC88C	611204	GABBR2	607340	MPC1	614738	RNASET2	612944	UNC80	612636
CD96	606037	GABRA1	137160	MPDU1	604041	RNF113A	300951	UPB1	606673
CDC42	116952	GABRB2	600232	MPLKIP	609188	RNF125	610432	UPF3B	300298
CDC45	603465	GABRB3	137192	MRPS22	605810	RNF168	612688	UQCRC2	191329
CDC6	602627	GAD1	605363	MRPS34	611994	RNU4ATAC	601428	UQCRQ	612080
CDK10	603464	GALE	606953	MSMO1	607545	ROGDI	614574	UROC1	613012
CDK13	603309	GALT	606999	MSTO1	617619	ROR2	602337	USP27X	300975
CDK5RAP2	608201	GAMT	601240	MTFMT	611766	RPE65	180069	USP9X	300072
CDK6	603368	GAN	605379	MTHFD1	172460	RPGRIP1L	610937	VAPB	605704
CDKL5	300203	GATA1	305371	MTHFR	607093	RPL10	312173	VARS	192150
CDT1	605525	GATA6	601656	MTO1	614667	RPS19	603474	VARS2	612802
CENPE	117143	GATAD2B	614998	MTOR	601231	RPS23	603683	VIPAS39	613401
CENPJ	609279	GATM	602360	MVK	251170	RPS6KA3	300075	VLDLR	192977
CEP120	613446	GBA	606463	MYCN	164840	RRM2B	604712	VMA21	300913
CEP135	611423	GBA2	609471	MYH3	160720	RSPRY1	616585	VPS11	608549
CEP152	613529	GBE1	607839	MYMK	615345	RTEL1	608833	VPS13B	607817
CEP19	615586	GCH1	600225	MYO18B	607295	RTN4IP1	610502	VPS33B	608552
CEP290	610142	GCK	138079	MYO5A	160777	RTTN	610436	VPS37A	609927
CEP41	610523	GCSH	238330	MYT1L	613084	RUBCN	613516	VPS53	615850
CEP57	607951	GDI1	300104	NAA10	300013	RUSC2	611053	VRK1	602168
CEP63	614724	GEMIN4	606969	NAA15	608000	SACS	604490	VWA3B	614884
CEP83	615847	GFM1	606639	NACC1	610672	SALL1	602218	WARS2	604733
CERS1	606919	GINS1	610608	NADK2	615787	SAMHD1	606754	WASHC4	615748
CHAMP1	616327	GJA1	121014	NAGA	104170	SARS	607529	WDFY3	617485
CHD1	602118	GJA5	121013	NAGLU	609701	SASS6	609321	WDR19	608151
CHD2	602119	GJA8	600897	NALCN	611549	SATB2	608148	WDR26	617424
CHD4	603277	GJC2	608803	NANS	605202	SBDS	607444	WDR45	300526
CHD7	608892	GK	300474	NARS2	612803	SBF1	603560	WDR62	613583
CHD8	610528	GLB1	611458	NAT8L	610647	SC5D	602286	WDR73	616144
CHKB	612395	GLDC	238300	NBN	602667	SCN1A	182389	WDR81	614218
CHMP1A	164010	GLI2	165230	NDE1	609449	SCN8A	600702	WFS1	606201
CHRNA4	118504	GLI3	165240	NDN	602117	SCN9A	603415	WNT5A	164975
CHST14	608429	GLUD1	138130	NDP	300658	SCO1	603644	WT1	607102
CIC	612082	GLYCTK	610516	NDST1	600853	SCYL1	607982	WWOX	605131
CIT	605629	GMNN	602842	NDUFA10	603835	SDCCAG8	613524	XK	314850
CKAP2L	616174	GMPPA	615495	NDUFA12	614530	SDHA	600857	XPA	611153
CLCN4	302910	GMPPB	615320	NDUFA2	602137	SDHAF1	612848	XPNPEP3	613553
CLCNKA	602024	GNAO1	139311	NDUFA9	603834	SDHD	602690	XPR1	605237
CLCNKB	602023	GNAQ	600998	NDUFAF2	609653	SEC61A1	609213	XRCC2	600375
CLIC2	300138	GNAS	139320	NDUFAF6	612392	SEMA3E	608166	XRCC4	194363
CLN3	607042	GNB1	139380	NDUFB11	300403	SEPSECS	613009	XYLT1	608124
CLN5	608102	GNB5	604447	NDUFS3	603846	SERAC1	614725	YAP1	606608
CLN8	607837	GNPAT	602744	NDUFS4	602694	SETBP1	611060	YME1L1	607472
CLP1	608757	GNPTAB	607840	NDUFS7	601825	SETD2	612778	YWHAG	605356
CLPB	616254	GNPTG	607838	NDUFS8	602141	SETD5	615743	YY1	600013
CLPP	601119	GNS	607664	NEDD4L	606384	SF3B4	605593	YY1AP1	607860
CNBP	116955	GORAB	607983	NEU1	608272	SFXN4	615564	ZBTB16	176797
CNNM2	607803	GOSR2	604027	NEXMIF	300524	SGPL1	603729	ZBTB18	608433
CNPY3	610774	GPI	172400	NF1	613113	SGSH	605270	ZBTB20	606025
CNTNAP2	604569	GPR88	607468	NFE2L2	600492	SHANK3	606230	ZBTB24	614064
COA5	613920	GPSM2	609245	NFIA	600727	SHH	600725	ZC3H14	613279
COA7	615623	GPT2	138210	NFIX	164005	SHOC2	602775	ZEB2	605802
COG2	606974	GRIA3	305915	NGF	162030	SHROOM4	300579	ZFYVE26	612012
COG4	606976	GRIA4	138246	NHP2	606470	SIL1	608005	ZIC1	600470
COG6	606977	GRIK2	138244	NHS	300457	SIN3A	607776	ZIC2	603073
COL4A1	120130	GRIN1	138249	NIN	608684	SIX3	603714	ZMYND11	608668
COL4A3BP	604677	GRIN2A	138253	NIPBL	608667	SIX6	606326	ZNF148	601897
COLEC11	612502	GRIN2B	138252	NKX2-5	600584	SKI	164780	ZNF335	610827
COPB2	606990	GRIN2D	602717	NKX6-2	605955	SLC12A1	600839	ZNF592	613624
COQ2	609825	GRIP1	604597	NLGN3	300336	SLC12A5	606726	ZNF711	314990
COQ8A	606980	GRM1	604473	NLGN4X	300427	SLC12A6	604878	ZNHIT3	604500
COQ9	612837	GSS	601002	NONO	300084	SLC13A5	608305	ZSWIM6	615951
COX10	602125	GTF2E2	189964	NOP10	606471	SLC16A1	600682
COX14	614478	GUCY2D	600179	NPAP1	610922	SLC16A2	300095
COX15	603646	GUF1	617064	NPHP1	607100	SLC17A5	604322
