# Supplementary material for: Identification of candidate gene FAM183A and novel pathogenic variants in known genes: High genetic heterogeneity for autosomal recessive intellectual disability
Source: PLoS One. 2018 Nov 30;13(11):e0208324. doi: 10.1371/journal.pone.0208324 (PMC6267965; doi:10.1371/journal.pone.0208324)
Supplement: S2 Table — (XLSX) [file pone.0208324.s002.xlsx]

## Sheet: Sheet1
Primer Name		Primer Sequence	Size (bp)
CC2D1A_c.811delG	Forward	CATGGGCAACAGAGTGAGG	338
CC2D1A_c.811delG	Reverse	GATGCAAATTTGGGTGCTTT
FAM183A_c.377G>A	Forward	CAGGCTTCTTTCTGATTCTGC	293
FAM183A_c.377G>A	Reverse	TCTCACATTGCTTTACCACACA
TUSC3_c.793C>T	Forward	AAACACTGCACCCTGTTTTTC	220
TUSC3_c.793C>T	Reverse	TGACTGACAAACAGAATCTTTTCC
PQBP1_c.459_462delAGAG	Forward	CCCCAGATGCTGAAGAAAAG	300
PQBP1_c.459_462delAGAG	Reverse	CCAGCTTACCCTTCTTGCTCT
MCPH1_c.427dupA	Forward	TGTTCTTTTTGCACAGCGTAA	309
MCPH1_c.427dupA	Reverse	TATTATGGCTCCCAGCCAAG
WDR62_c.3406C>T	Forward	CCAGAAGGCATCCAGGTAGA	308
WDR62_c.3406C>T	Reverse	GCTCTGAGGTGAGGACAAGG
SLC9A6_c.1631+1G>A	Forward	TGTTACCCTTGTTGGAGAGTGTC	397
SLC9A6_c.1631+1G>A	Reverse	ACGGTTTCATGGGTTTGAAG
ZNF335_c.808C>T	Forward	GGAAGTGGAGGGAGGGTAAG	314
ZNF335_c.808C>T	Reverse	CCCACATCCACATCCACAT
ZNF335_c.3715C>A	Forward	GATCTGGCCCTCCTGTACCT	290
ZNF335_c.3715C>A	Reverse	GCTGGTGGCTGTTCCTAGTC
ASPM_c.5219_5225delGAGGATA	Forward	CAGCAATGTTACCGTTCCAA	264
ASPM_c.5219_5225delGAGGATA	Reverse	CTTCCTCTGATTGACCTGTGC
RARS_c.1588A>G	Forward	TGCAGAGGAATTGAATGCTG	266
RARS_c.1588A>G	Reverse	AAGACCCCGTCTCATTTCAA
