# Supplementary material for: Identification of candidate gene FAM183A and novel pathogenic variants in known genes: High genetic heterogeneity for autosomal recessive intellectual disability
Source: PLoS One. 2018 Nov 30;13(11):e0208324. doi: 10.1371/journal.pone.0208324 (PMC6267965; doi:10.1371/journal.pone.0208324)
Supplement: S3 Table — (XLSX) [file pone.0208324.s003.xlsx]

## Sheet: Sheet1
Parameter	WES
Variation types to test	SNPs only
Ignore rare or common variations	<5% and >95%
Ignore variations that have a quality score less than	20
Consolidate nearby regions	Checked
Minimum region length	50000 bp
Window scan size	10 variations
Maximum number heterozygous variants in window scan	1
Percent of windows for homozygous position call	0.05
Number of consecutive positions to call a homozygous region	15
Maximum gap between variations in a region	100000 bp
