# Supplementary material for: Identification of candidate gene FAM183A and novel pathogenic variants in known genes: High genetic heterogeneity for autosomal recessive intellectual disability
Source: PLoS One. 2018 Nov 30;13(11):e0208324. doi: 10.1371/journal.pone.0208324 (PMC6267965; doi:10.1371/journal.pone.0208324)
Supplement: S4 Table — (XLSX) [file pone.0208324.s004.xlsx]

## Sheet: Sheet1
Family ID	Gene	Transcript ID	c.DNA	Chromosome	Position (hg19)	Reference	Alternate
AU10	CC2D1A	NM_017721.4	c.811delG	19	14028945	G	-
MR25	FAM183A	NM_001101376.2	c.377G>A	1	43621956	G	A
MR32	TUSC3	NM_006765.3	c.793C>T	8	15531340	C	T
S25	PQBP1	NM_001032383.1	c.459_462delAGAG	X	48759668	AGAG	-
S223	MCPH1	NM_024596.4	c.427dupA	8	6293669	-	A
S228	WDR62	NM_001083961.1	c.3406C>T	19	36593920	C	T
S234	SLC9A6	NM_006359.2	c.1631+1G>A	X	135115653	G	A
S236	ZNF335	NM_022095.3	c.808C>T	20	44596379	G	A
		NM_022095.3	c.3715C>A	20	44578162	G	T
S243	ASPM	NM_018136.4	c.5219_5225delGAGGATA	1	197073156	TATCCTC	-
S244	RARS	NM_002887.3	c.1588A>G	5	167943918	A	G
