# Supplementary material for: Identification of candidate gene FAM183A and novel pathogenic variants in known genes: High genetic heterogeneity for autosomal recessive intellectual disability
Source: PLoS One. 2018 Nov 30;13(11):e0208324. doi: 10.1371/journal.pone.0208324 (PMC6267965; doi:10.1371/journal.pone.0208324)
Supplement: S5 Table — (XLSX) [file pone.0208324.s005.xlsx]

## Sheet: Sheet1
Family-individual ID	Simplex/Multiplex	Parental consanguinity reported	Sex	Age at last exam	Growth	Craniofacial	Cardio vascular	Abdomen /GU	Skeletal	Skin/hair /nails	Neurologic
S217-II:1	Multiplex	Yes	Female	6 years	Normal height and weight	Microcephaly, long nose	No abnormal clinical finding	No abnormal clinical finding	Kyphosis, limitation of movement in elbows	No abnormal clinical finding	ID, Developmental delay
S221-II:1	Multiplex	Yes	Male	9.5 years	Normal height and weight	Microcephaly	No abnormal clinical finding	No abnormal clinical finding	No abnormal clinical finding	No abnormal clinical finding	ID, developmental delay especially speech delay
S221-II:2	Multiplex	Yes	Male	5 years	Normal height and weight	Microcephaly	No abnormal clinical finding	No abnormal clinical finding	No abnormal clinical finding	No abnormal clinical finding	ID, developmental delay especially speech delay
S224-II:2	Simplex	Yes	Male	16 years	Normal height	Microcephaly, long face, beak nose	No abnormal clinical finding	No abnormal clinical finding	Scoliosis, mallet fingers in left hand	No abnormal clinical finding	ID, developmental delay
S227-II:1	Simplex	No	Female	10 months	Short stature	Microcephaly	Recurrent pulmoner infections	Recurrent urinary tract infections	No abnormal clinical finding	No abnormal clinical finding	Not available
S229-II:1	Simplex	Yes	Female	8 months	Normal height and weight	Microcephaly	No abnormal clinical finding	No abnormal clinical finding	No abnormal clinical finding	No abnormal clinical finding	Not available
S230-II:2	Simplex	No	Male	22 months	Normal height and weight	Microcephaly	No abnormal clinical finding	No abnormal clinical finding	No abnormal clinical finding	No abnormal clinical finding	ID, developmental delay
S232-II:1	Simplex	No	Male	5 years	Normal height and weight	Microcephaly, large ears, broad forehead, long philtrum, depressed nasal bridge, epicanthal folds, high palate, thin upper lip, strabismus	No abnormal clinical finding	Hypospadias	No abnormal clinical finding	No abnormal clinical finding	ID, developmental delay, autistic spectrum disorder
S233-II:3	Simplex	No	Male	19 years	Normal height and weight	Microcephaly, brachycephaly, narrow forehead, prominent metopic suture, strabismus, large ears, depressed nasal bridge, anteverted nares, narrow and high palate, epicanthal folds, blue sclera	No abnormal clinical finding	Gastroesophageal reflux	Brachydactyly	Dry and coarse hair	ID, developmental delay
S239-II:1	Multiplex	Yes	Male	14 years	Normal height and weight	No abnormal clinical finding	No abnormal clinical finding	Macroorchidism, imperforate anus	No abnormal clinical finding	No abnormal clinical finding	ID, autistic spectrum disorder, hyperactivity
S239-II:2	Multiplex	Yes	Male	10 years	Short stature	Large ears, crooked Teeth	Systolic heart murmurs (1/6)	No abnormal clinical finding	No abnormal clinical finding	No abnormal clinical finding	ID, speech delay, autistic spectrum disorder, hyperactivity
S245-II:1	Simplex	No	Male	1 years	Normal height and weight	Microcephaly, micrognathia, large ears	Systolic heart murmurs (1/6)	No abnormal clinical finding	No abnormal clinical finding	No abnormal clinical finding	Not available
S149-II:2	Multiplex	No	Male	17 years	Normal height and weight	Hypertelorism, Broad forehead	No abnormal clinical finding	No abnormal clinical finding	Loss of lumbar lordosis, vertebral sclerosis	Coarse hair, synophrys	ID, developmental delay, self mutilation, seizures
S149-II:3	Multiplex	No	Male	15 years	Normal height and weight	No abnormal clinical finding	No abnormal clinical finding	No abnormal clinical finding	No abnormal clinical finding	No abnormal clinical finding	ID, developmental delay
